# Supplementary material for: Photocurable epoxy-based composite for rapid orthopedic soft casting
Source: Royal Society of Chemistry journal article supplement (doi:10.1039/d4lp00248b), 2024-12-04
Supplement: d4lp00248b1.pdf [file d4lp00248b1.pdf]

Electronic Supplementary Information

# Photocurable epoxy-based composite for rapid orthopedic soft casting

Beatrice Tosetto,<sup>a,b,c</sup> Roberto Mo,<sup>c</sup> Candido Fabrizio Pirri,<sup>a,c</sup> Ignazio Roppolo<sup>a,c</sup>

- a. Department of Applied Science and Technology, Politecnico di Torino, Corso Duca degli Abruzzi 24, Turin 10129, Italy.
- b. Department of Chemistry, Biology and Biotechnology, University of Perugia, Via Elce di Sotto 8, 06123, Perugia, Italy.
- c. Center for Sustainable Future Technologies, Italian Institute of Technology, Via Livorno 60, 10144 Turin, Italy.

## Table of content: List of Figures

|                                                                                                                                                                                                                                                            |    |
|------------------------------------------------------------------------------------------------------------------------------------------------------------------------------------------------------------------------------------------------------------|----|
| Figure S 1. ATR analyses results of: a) the net soaked in 2.1 T67/ 2 ITX formulation; b) #Single_LD sample.                                                                                                                                                | 5  |
| Figure S 2. ATR analyses results of: a) #Single_HD sample; b) #Double sample                                                                                                                                                                               | 6  |
| Figure S 3. ATR analyses results of samples: a) single-layer   Solar Simulator   520 W   2 min; b) single-layer   Solar Simulator   520 W   6 min; c) double-layer   Solar Simulator   520 W   6 min; d) double -layer   Solar Simulator   520 W   10 min. | 8  |
| Figure S 4. Stress vs. Deformation curve of 2.1 T67/2 ITX single- and double-layer composites analyzed by tensile tests 12 days after the irradiation through Solar Simulator and optimized curing parameters (Table S 4).                                 | 9  |
| Figure S 5. a) Selected LED strip; Lamp structure's Scheme (top view-b) and Picture (Frontal view-c) highlighting the main geometrical parameter used to tune the light intensity.                                                                         | 10 |
| Figure S 6. ATR analyses results of samples reported in Table S 7.                                                                                                                                                                                         | 12 |
| Figure S 7. Evaluation of the temperatures developed on the irradiated side of single-layer composites polymerized in different curing conditions whit LED lamp (sample description and curing parameters in Table S 7).                                   | 12 |
| Figure S 8. Picture of single-layer strip samples right after irradiation obtained with the ad-hoc designed lamp: left to right S_P-1.5_30, S_P-1.5_40, S_P-3.5_70, S_P-3.5_90 (sample description and curing parameters in Table S 7)                     | 13 |
| Figure S 9. Maximum temperatures developed on the irradiated side of single- or double-layer composites polymerized in different curing conditions whit LED lamp in one irradiation step (sample description and curing parameters in Table S 8).          | 13 |
| Figure S 10. External maximum temperatures developed on the irradiated side of 2.1 T67/2 ITX cylindrical double-layer composites samples described in Table S 8 and irradiated in 3 steps.                                                                 | 14 |
| Figure S 11. Load vs. Deformation of: a) POP and FGC samples prepared by a registered technician; b) cylindrical double-layer composites cured with LED Lamp (parameters in Table S 8) in 3 steps.                                                         | 14 |

## Table of content: List of Tables

|                                                                                                                                                                                                                                                 |    |
|-------------------------------------------------------------------------------------------------------------------------------------------------------------------------------------------------------------------------------------------------|----|
| Table S 1. Formulations and curing parameters of samples polymerized with UV light.                                                                                                                                                             | 3  |
| Table S 2. Formulations, curing parameters and results for the evaluation of the different Phi/PhS combination.                                                                                                                                 | 4  |
| Table S 3. One month Conversion Degree evolution of 2.1 T67/2 ITX composites samples described in Table 2.                                                                                                                                      | 4  |
| Table S 4. Optimized curing parameters for 2.1 T67/2 ITX single- and double- layer composites with broad band visible light.                                                                                                                    | 6  |
| Table S 5. One month Conversion Degree evolution of 2.1 T67/2 ITX composites samples polymerized through different broad band visible light. (Spectra are reported in Figure S 1, Figure S 2 and Figure S 3)                                    | 7  |
| Table S 6. Geometrical Parameter and measured light intensity of the tested lamp configuration.                                                                                                                                                 | 10 |
| Table S 7. Curing condition and CDs of 2.1 T67/2 ITX single-layer composite samples through LED lamp.                                                                                                                                           | 12 |
| Table S 8. Curing parameters of 2.1 T67/2 ITX samples irradiated with the ad-hoc design LED lamp.                                                                                                                                               | 13 |
| Table S 9. Optimized curing parameters for 2.1 T67/2 ITX single- and double- layer composites with the ad-hoc designed LED lamp.                                                                                                                | 14 |
| Table S 10. Initial stiffness and Yield force evaluated after two consecutive 3 point bending test on: cylindrical double-layer composites after 2 months since irradiation, POP and FGC reference samples prepared by a registered technician. | 15 |
| Table S 11. Mass variation after harsh conditions exposure of double-layer composites.                                                                                                                                                          | 15 |

Table S 1. Formulations and curing parameters of samples polymerized with UV light.

| PhI    |     | Films                                 |                      | Bulk samples                          |                      | Single-Layer Composite                |                      |                |               | Tested with PhS       |
|--------|-----|---------------------------------------|----------------------|---------------------------------------|----------------------|---------------------------------------|----------------------|----------------|---------------|-----------------------|
| Name   | phr | Light Intensity (mW/cm <sup>2</sup> ) | Irradiation time (s) | Light Intensity (mW/cm <sup>2</sup> ) | Irradiation time (s) | Light Intensity (mW/cm <sup>2</sup> ) | Irradiation time (s) | Polymerization | self-standing |                       |
| Iod I  | 3   | 130                                   | 40                   | 40                                    | 120                  | -                                     | -                    | Yes, but slow  | Yes           | Yes                   |
|        | 6   | -                                     | -                    | 40                                    | 40                   | 30                                    | 100                  | Yes            | Yes           | Yes                   |
| Iod II | 6   | -                                     | -                    | 40                                    | 40                   | 30                                    | 100                  | Yes            | No            | No                    |
| T65    | 6   | -                                     | -                    | 40                                    | 40                   | 30                                    | 90                   | Yes            | No            | No                    |
| T67    | 6.4 | 40                                    | 40                   | 40                                    | 40                   | 40                                    | 10                   | Yes, burned    | Yes           | Yes (but 4.2-2.1 phr) |
| Solf   | 4.6 | 130                                   | 30                   | 40                                    | 120                  | 20                                    | 20                   | Yes            | Yes           | Yes (also 6.9 phr)    |
| BTB    | 5   | 40                                    | 40                   | 40                                    | 40                   | 40                                    | 40                   | Yes            | Yes           | Yes (also 3 phr)      |

Table S 2. Formulations, curing parameters and results for the evaluation of the different PhI/PhS combination.

| Formulation Composition |     |      |     |                               |              | Polymerization          | Evaluation <sup>b</sup> |
|-------------------------|-----|------|-----|-------------------------------|--------------|-------------------------|-------------------------|
| PhI                     |     | PhS  |     | Irradiation Time <sup>a</sup> |              |                         |                         |
| Name                    | phr | Name | phr | Film                          | Bulk samples |                         |                         |
| Iod I                   | 3   | ITX  | 2   | 10 min                        | -            | No                      | E                       |
| T67                     | 4.2 | ITX  | 2   | 9 min                         | 9 min        | Incomplete and too slow | E                       |
| Solf                    | 4.6 | ITX  | 2   | 2 min                         | -            | Yes                     | FA                      |
| BTB                     | 5   | ITX  | 2   | 9 min                         | 9 min        | Too slow                | E                       |
| Iod I                   | 3   | C    | 2   | 3.5 min                       | -            | Yes, but slow           | FA                      |
| T67                     | 4.2 | C    | 2   | 100 s                         | 100 s        | Yes                     | FA                      |
| Solf                    | 4.6 | C    | 2   | 2 min                         | -            | Yes                     | FA                      |
| BTB                     | 5   | C    | 2   | 100 s                         | 100 s        | Yes                     | FA                      |

<sup>a</sup> With 40 mW/cm<sup>2</sup> visible broad band white light (Hamamatsu lamp)

<sup>b</sup> E: Excluded; FA: further analyzed

Table S 3. Conversion Degree evolution of 2.1 T67/2 ITX composites samples over one month.

|                                  |                | #Single_LD      |                 | #Single_HD      |                 | #Double         |                 |
|----------------------------------|----------------|-----------------|-----------------|-----------------|-----------------|-----------------|-----------------|
|                                  |                | DI <sup>a</sup> | NI <sup>b</sup> | DI <sup>a</sup> | NI <sup>b</sup> | DI <sup>a</sup> | NI <sup>b</sup> |
| <b>CD<sup>c</sup> (%) after:</b> | <b>1 hour</b>  | 77              | 66              | 96              | 88              | 66              | 50              |
|                                  | <b>6 hours</b> | 82              | 77              | --              | --              | 94              | 83              |
|                                  | <b>3 days</b>  | 87              | 87              | --              | --              | --              | 83              |
|                                  | <b>7 days</b>  | 88              | --              | 95              | 91              | 95              | 87              |
|                                  | <b>1 month</b> | 89              | 89              | 100             | 97              | 94              | 88              |

<sup>a</sup> Directly irradiated side

<sup>b</sup> Not irradiated (opposite side to the irradiated one)

<sup>c</sup> Samples described in Table 2

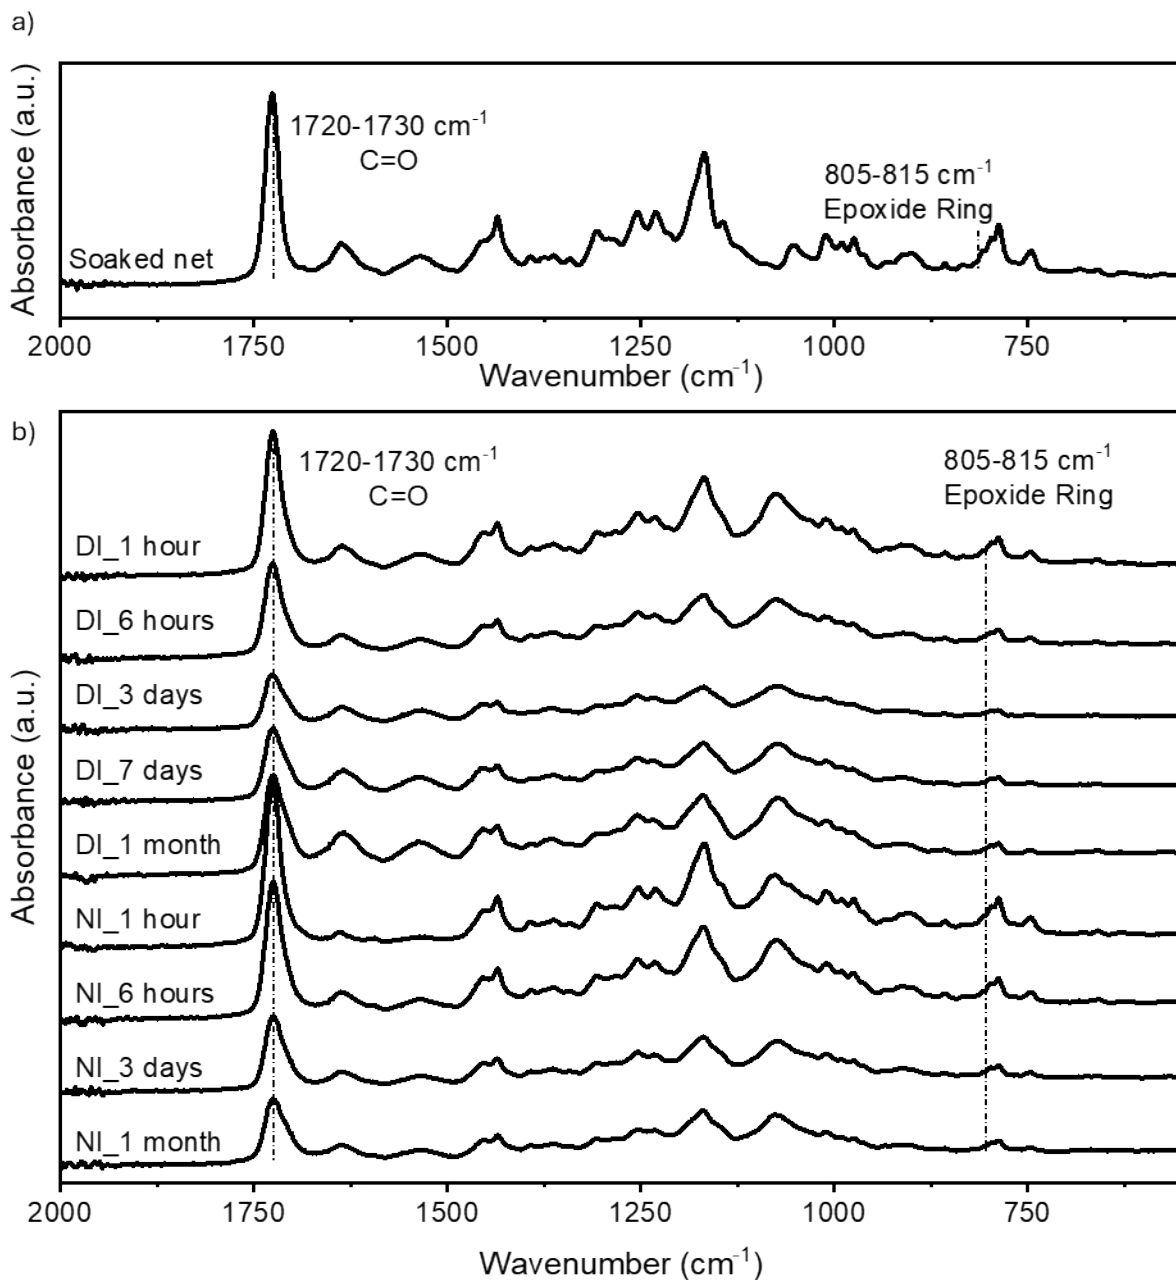

Figure S 1. ATR analyses results of: a) the net soaked in 2.1 T67/ 2 ITX formulation; b) #Single\_LD sample

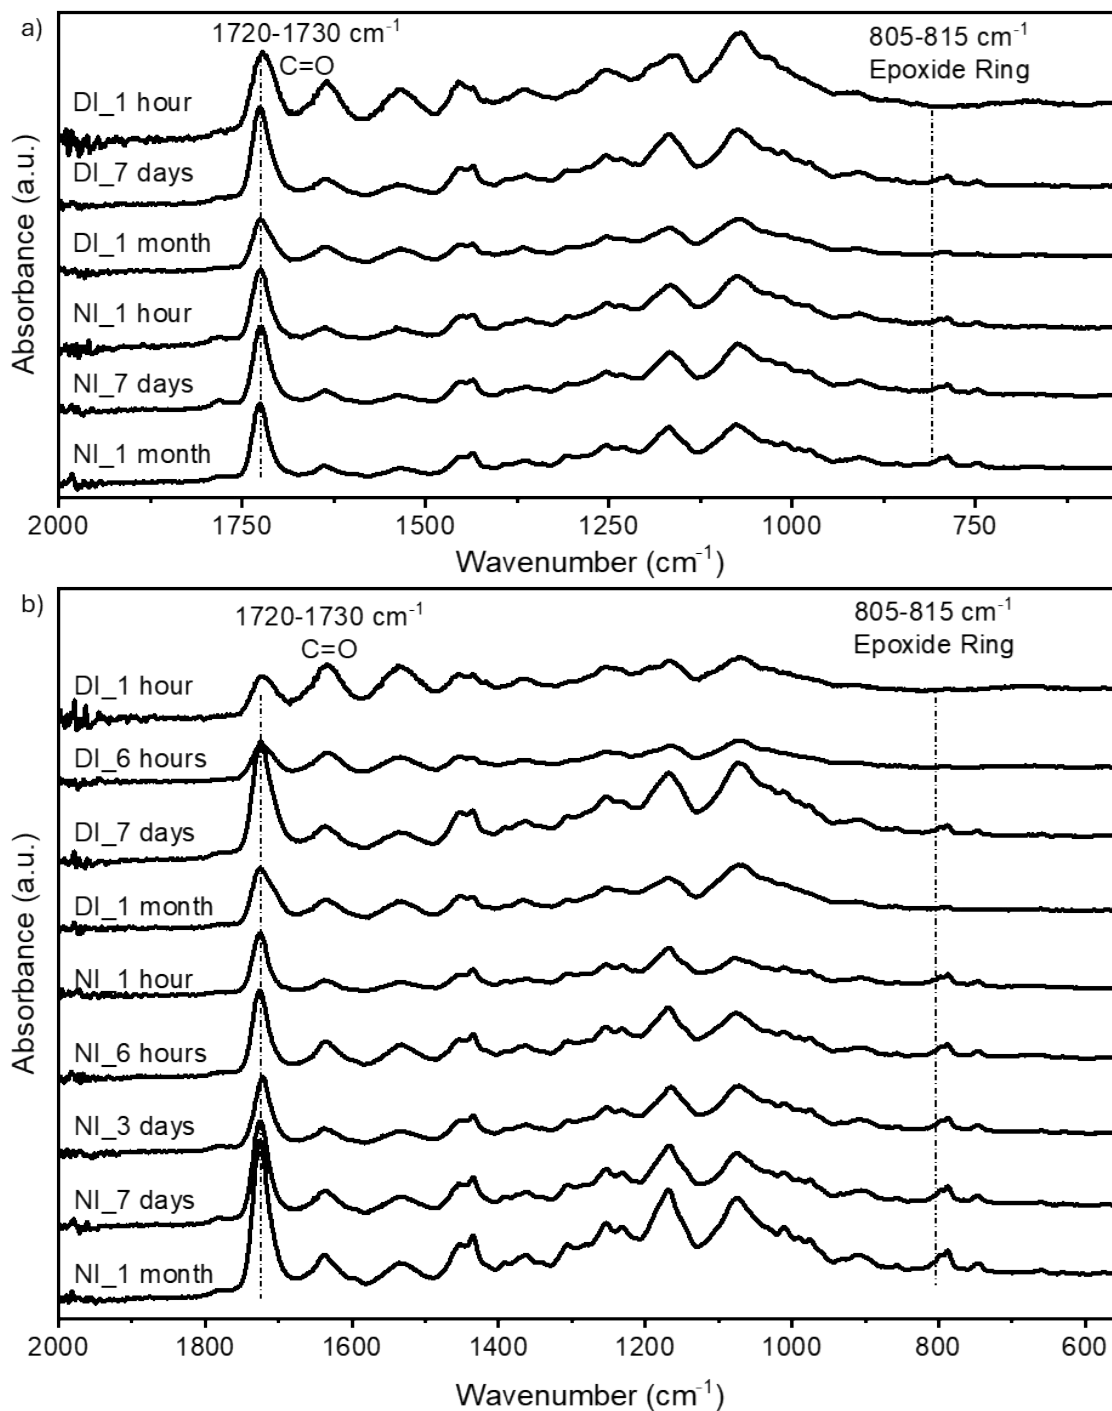

Figure S 2. ATR analyses results of: a) #Single\_HD sample; b) #Double sample

Table S 4. Optimized curing parameters for 2.1 T67/2 ITX single- and double- layer composites with broad band visible light.

| Light source    | Single-layer           |                  | Double-layer           |                  |
|-----------------|------------------------|------------------|------------------------|------------------|
|                 | Light intensity/power  | Irradiation time | Light intensity/power  | Irradiation time |
| Solar Simulator | 520 W                  | 6 min            | 520 W                  | 10 min           |
| Hamamatsu Lamp  | 130 mW/cm <sup>2</sup> | 50 s             | 130 mW/cm <sup>2</sup> | 180 s            |



Table S 5. One month Conversion Degree evolution of 2.1 T67/2 ITX composites samples polymerized through different broad band visible light. (Spectra are reported in Figure S 1, Figure S 2 and Figure S 3)

| Light source    | Layer number | Curing condition               | CD%                       |                           |                           |                           |
|-----------------|--------------|--------------------------------|---------------------------|---------------------------|---------------------------|---------------------------|
|                 |              |                                | DI <sup>a</sup>           |                           | NI <sup>a</sup>           |                           |
|                 |              |                                | 6 hours after irradiation | 1 month after irradiation | 6 hours after irradiation | 1 month after irradiation |
| Solar Simulator | Single-layer | 520 W   2 min                  | 78%                       | 98%                       | 71%                       | 92%                       |
|                 |              | 520 W   6 min                  | 96%                       | 96%                       | 93%                       | 100%                      |
|                 | Double-layer | 520 W   6 min                  | 89%                       | 97%                       | 82%                       | 96%                       |
|                 |              | 520 W   10 min                 | 96%                       | 97%                       | 86%                       | 95%                       |
| Hamamatsu Lamp  | Single-layer | 40 mW/cm <sup>2</sup>   50 s   | 82%                       | 89%                       | 77%                       | 89%                       |
|                 |              | 130 mW/cm <sup>2</sup>   50 s  | 96% <sup>b</sup>          | 97%                       | 88% <sup>b</sup>          | 100%                      |
|                 | Double-layer | 130 mW/cm <sup>2</sup>   180 s | 94%                       | 94%                       | 83%                       | 88%                       |

<sup>a</sup> DI: Directly irradiated side, NI: Not irradiated side (opposite side to the irradiated one).

<sup>b</sup> FT-IR measurements conducted 1 hour after irradiation

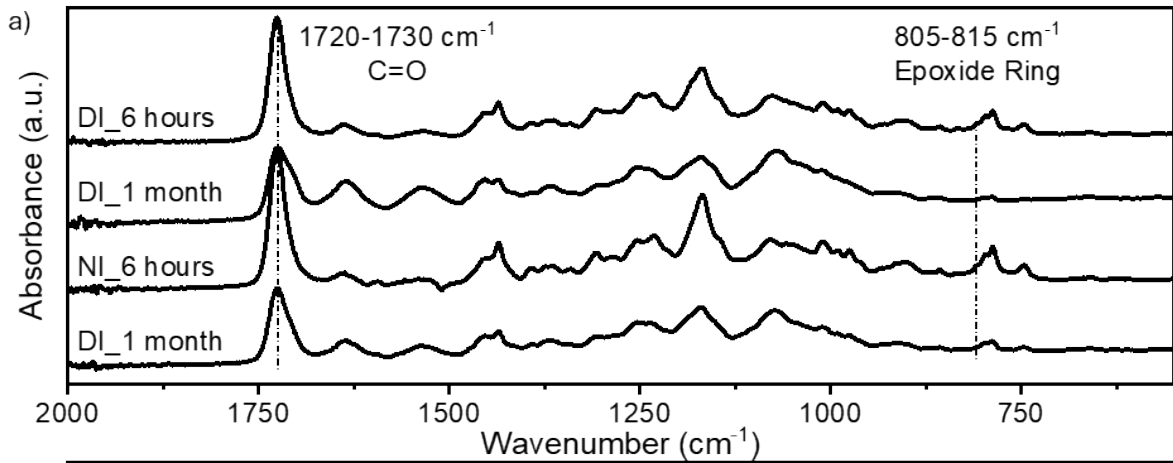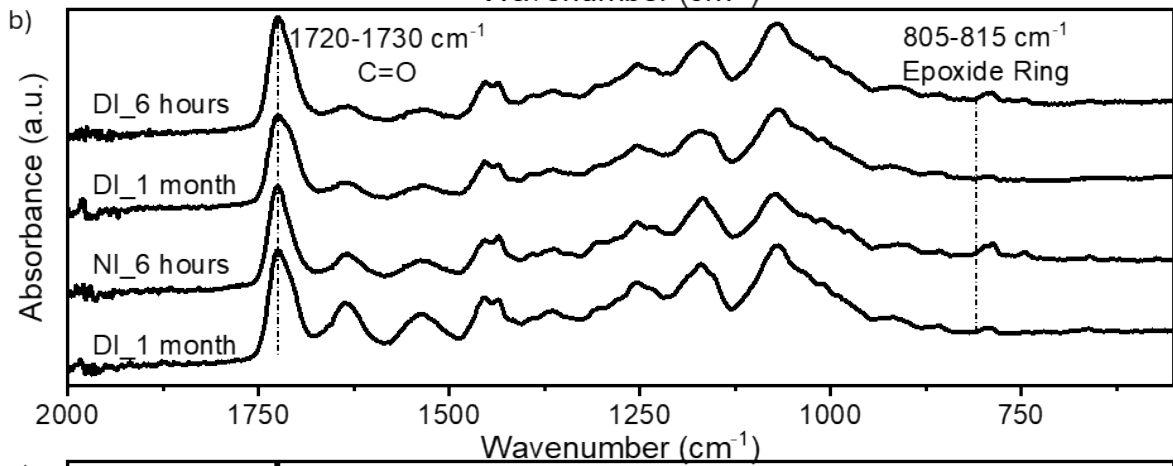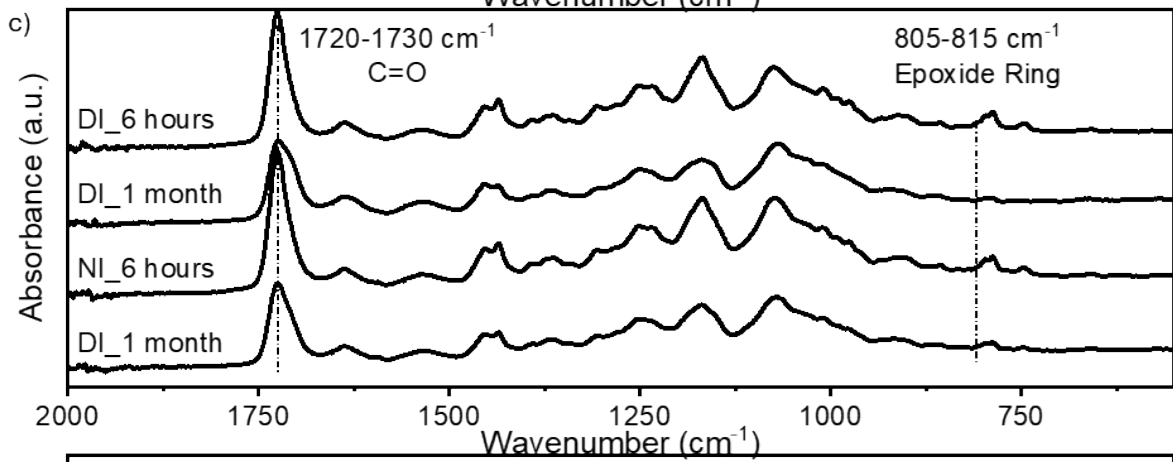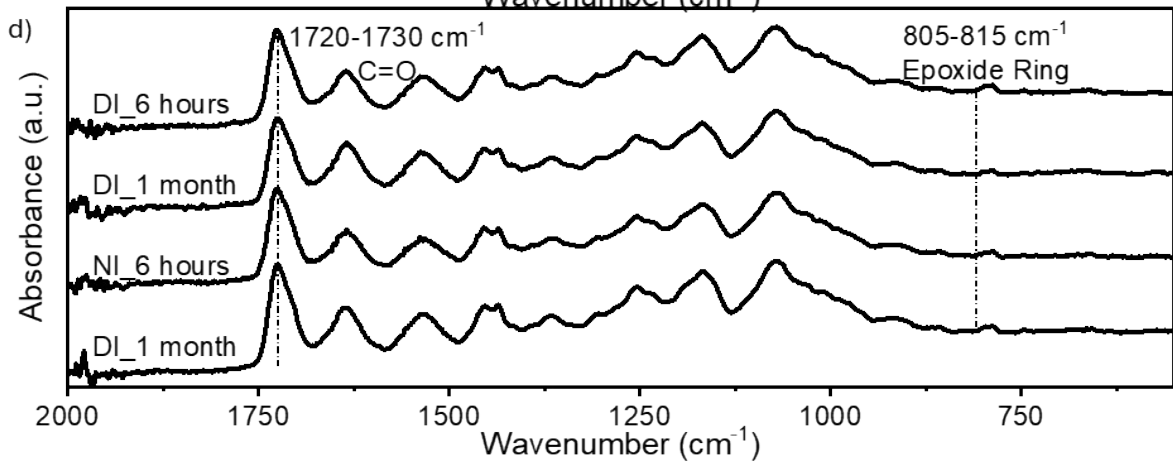

*Figure S 3. ATR analyses results of samples: a) single-layer | Solar Simulator | 520 W | 2 min; b) single-layer | Solar Simulator | 520 W | 6 min; c) double-layer | Solar Simulator | 520 W | 6 min; d) double-layer | Solar Simulator | 520 W | 10 min*

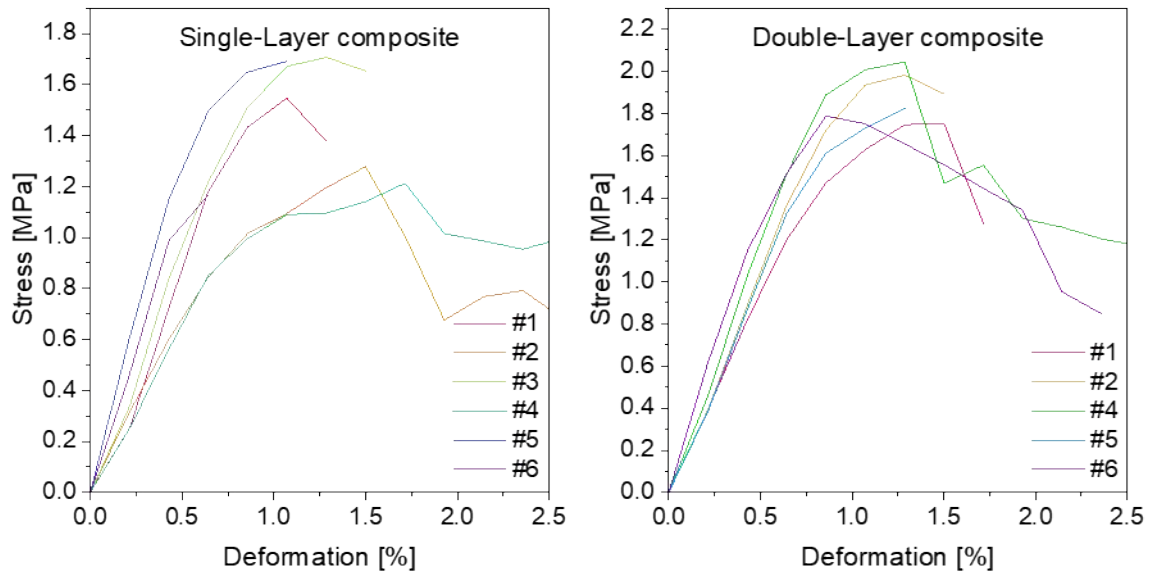

Figure S 4. Stress vs. Deformation curve of 2.1 T67/2 ITX single- and double-layer composites analyzed by tensile tests 12 days after the irradiation through Solar Simulator and optimized curing parameters (Table S 4).

## Ad-hoc designed Lamp characteristics and curing parameters optimization

The desired goals for a lamp that can suit the requests for curing rapid orthopedic cast consist of: (i) Visible light source, (ii) flexibility in the reachable light intensity, needed to study the proper curing condition, (iii) high lighting spot ( $>150\text{cm}^2$ ), in order to cure big samples (similar to a real arm cast) quickly, and (iv) portability. The selected LED strips (LS-XC06-S410-SD111, produced by Intelligent LED Solutions), are reported in Fig. S2a. The peak wavelength is between 410-420 nm with a radiance angle of  $125^\circ$ , and they were powered by a volt generator at 24 V. Six of those strips were arranged as depicted in Fig. Sb-c. Thanks to the lamp's flexible design it is possible to tune the light intensity and its distribution by modifying the lamp structure's angle or the LED/LED ( $d_{\text{LED}}$  and  $d_0$ ) or LED/Sample ( $d_c$ ) distance.

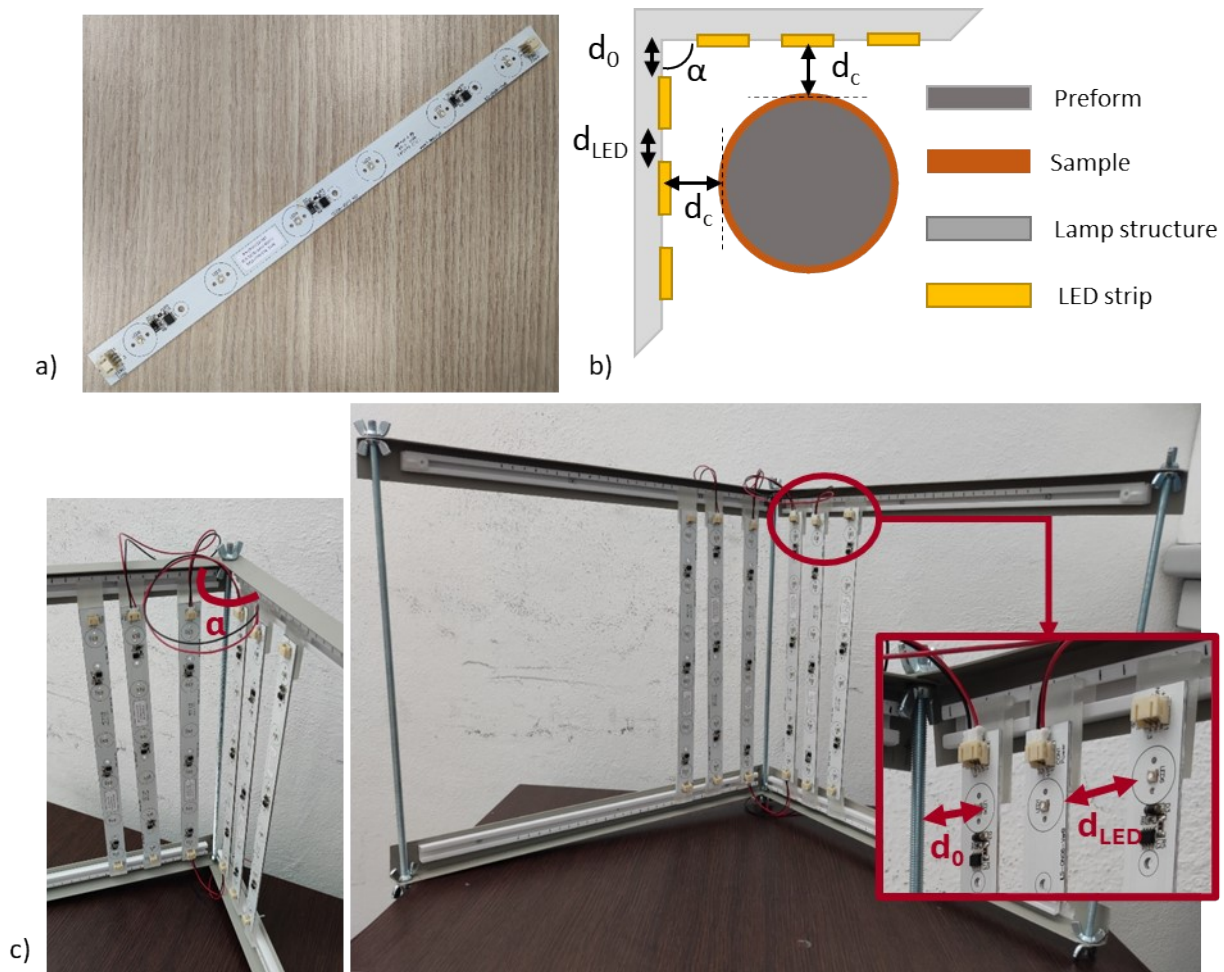

Figure S 5. a) Selected LED strip; Lamp structure's Scheme (top view-b) and Picture (Frontal view-c) highlighting the main geometrical parameter used to tune the light intensity.

The light intensity obtained in three lamp configurations was measured, and results are reported in Tab. S6. Light intensity on the irradiated surface is variable and it has multiple peaks troughs the irradiated area since the LED lamp is composed of 36 LEDs distributed in an area of  $440\text{ cm}^2$ .

Table S 6. Geometrical Parameter and measured light intensity of the tested lamp configuration.

| Configuration's name        | P-1.5                   | P-3.5                  | A-3.5                  |
|-----------------------------|-------------------------|------------------------|------------------------|
| <b>Preform</b>              |                         | Flat                   | Cylindrical            |
| <b><math>\alpha</math></b>  |                         | 180°                   | 90°                    |
| <b><math>d_{LED}</math></b> |                         | 2 cm                   | 2 cm                   |
| <b><math>d_0</math></b>     |                         | 1 cm                   | 3 cm                   |
| <b><math>d_c</math></b>     | 1.5 cm                  | 3.5 cm                 | 3.5 cm                 |
| <b>Light intensity</b>      | 1-40 mW/cm <sup>2</sup> | 5-8 mW/cm <sup>2</sup> | 5-8 mW/cm <sup>2</sup> |

The CD correlation with the developed external temperature that was observed with the white broad band light sources was also investigated for the LED lamp, so four tests were performed curing single-layer composites in different curing conditions (curing conditions, CDs, in Tab. S7; developed temperatures in Fig. S3, spectra in Fig. S6). When the light dose was too low (sample S\_P-1.5\_30), the polymerization process wasn't completely effective, as demonstrated by the low maximum temperature reached (<120°C), and the CD evaluated 6 hours after the irradiation is less than 80%; moreover, the composite appeared to be flexible. Instead, when the light dose is high enough (samples S\_P-3.5\_40 and S\_P-3.5\_70): the maximum temperature overcame 180°C, the CD reached a value up to 98%, and stiff spots on the composite were obtained. It is noteworthy that an inhomogeneous rigidity and a strong variability in the CD along the surface were evaluated in those last two samples; this is related to the intrinsic light intensity distribution on the irradiated surface performed by the LED lamp, which results in a non-uniform polymerization, as confirmed by their spotted color (samples' pictures in Fig. S4). In sample S\_P-1.5\_40, the light color spots match the LEDs position, where the light intensity was higher, and the polymerization was boosted. However, this inhomogeneity problem can be overcome by increasing the light dose, as proven by sample S\_P-3.5\_90 (curing condition in Tab. S7), which showed a uniform color (Fig. S4) and rigidity. And for this reason, in order to evaluate the proper curing parameters, the samples' color observation was added to the protocol. So, the optimal parameters for curing single-layer composites (Tab. S9) were selected in a conservative mode to ensure a homogeneous sample color by slightly increasing the light dose used for S\_P-3.5\_70 sample, where a satisfactory CD was already achieved (CD after 6 hours higher than 85-90%). Those parameters were used for sample S\_P-3.5\_90 and external temperature monitoring, reported in Fig. S5, confirmed the high reaction activation. Instead, for double-layer composites, the optimized parameters (Tab. S9) were selected based on the Temperature-CD analogy that was also confirmed with the LED lamp; in particular, the temperature developed by sample irradiated for 210 s (lamp configuration: P-3.5, irradiation time: 210 s, Fig. S5) matches the ones obtained with proper curing conditions with visible broad band white light (Fig. 2b), while sample irradiated for only 90 s (lamp configuration: P-3.5, irradiation time: 90 s, Fig. S5) didn't reach those values, so the higher energy dose employed should be adequate; moreover this last composites appear to have a uniform color and uniform and high rigidity.

Unfortunately, external temperature monitoring can't emphasize the polymerization dispersion on the surface because it only follows the maximum temperature developed in the framed area; still, a multi-peak trend could be observed in Fig. S3 and Fig. S5, which is related to the polymerization rate dispersion that is an effect of the light intensity distribution.

Finally, a comparison between the external temperature monitoring results obtained with the LED lamp (Fig. S5) and the visible broad band white light (Fig. S2b) was conducted; and the different sample's heating performed by the light sources is evident: with the visible broadband white light, the composites cool down very slowly after the temperature peak when the light is on, and the temperature drastically drop right after the light switch off; instead, LEDs produce less heat, as evidenced by the absence of a strong modification in the temperature as soon as the light went off.

Table S 7. Curing condition and CDs of 2.1 T67/2 ITX single-layer composite samples through LED lamp.

| Sample Name | Curing condition               | CD <sup>a</sup>   |                   |
|-------------|--------------------------------|-------------------|-------------------|
|             |                                | DI-U <sup>b</sup> | DI-F <sup>c</sup> |
| S_P-1.5_30  | 1-40 mW/cm <sup>2</sup>   30 s | 78%               | 80%               |
| S_P-1.5_40  | 1-40 mW/cm <sup>2</sup>   40 s | 93%               | 86%               |
| S_P-3.5_70  | 5-8 mW/cm <sup>2</sup>   70 s  | 98%               | 94%               |
| S_P-3.5_90  | 5-8 mW/cm <sup>2</sup>   90 s  | -                 | -                 |

<sup>a</sup> FR-IR measurements conducted 6 hours since irradiation

<sup>b</sup> DI-U: Directly irradiated surface under a LED (maximum light intensity),

<sup>c</sup> DI-F: Directly irradiated surface far from a LED (minimum light intensity).

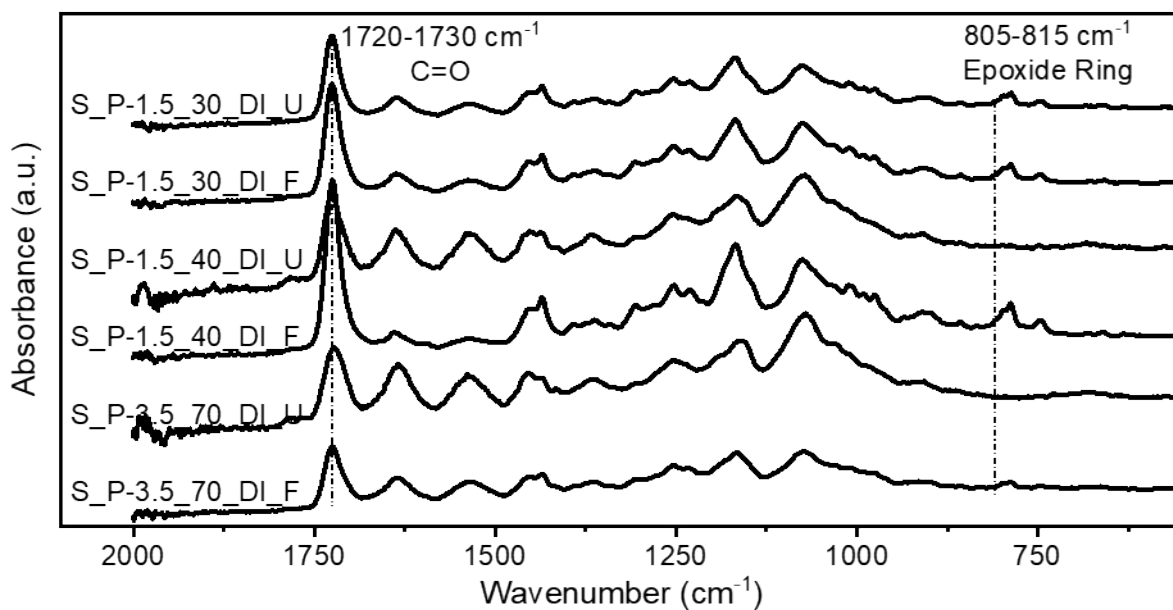

Figure S 6. ATR analyses results of samples reported in Table S 7.

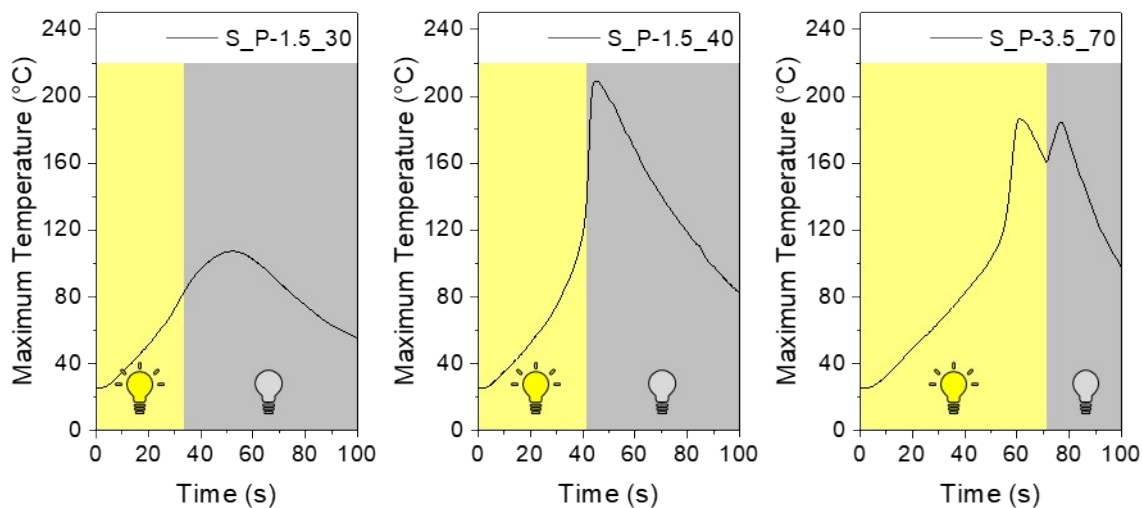

Figure S 7. Evaluation of the temperatures developed on the irradiated side of single-layer composites polymerized in different curing conditions whit LED lamp (sample description and curing parameters in Table S 7).

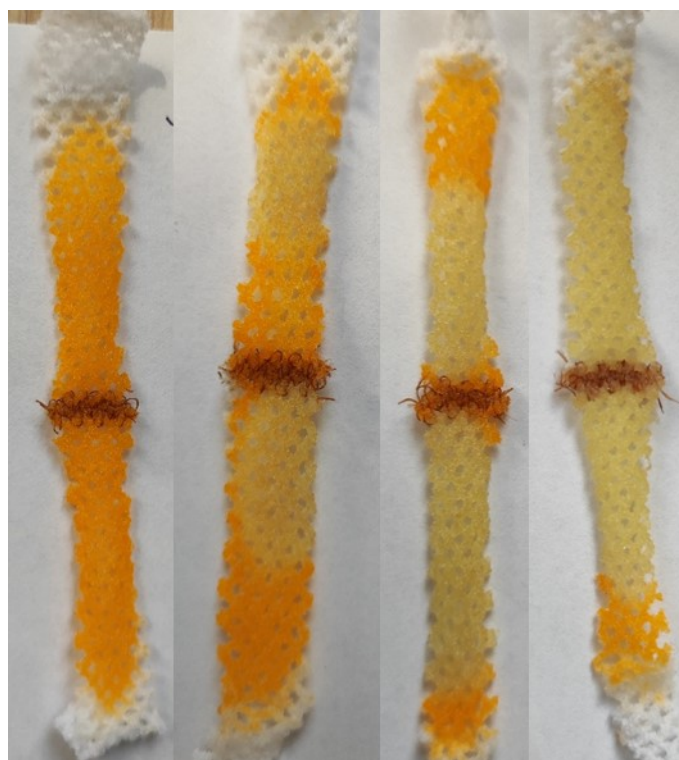

Figure S 8. Picture of single-layer strip samples right after irradiation obtained with the ad-hoc designed lamp: left to right S\_P-1.5\_30, S\_P-1.5\_40, S\_P-3.5\_70, S\_P-3.5\_90 (sample description and curing parameters in Table S 7)

Table S 8. parameters ITX samples with the ad-LED lamp.

Curing of 2.1 T67/2 irradiated hoc design

| Sample name     | n° of Layer (-) | Light Intensity (mW/cm <sup>2</sup> ) | Irradiation time (s) |
|-----------------|-----------------|---------------------------------------|----------------------|
| Single_LED_90s  | 1               | 5-8                                   | 90                   |
| Double_LED_90s  | 2               | 5-8                                   | 90                   |
| Double_LED_210s | 2               | 5-8                                   | 210                  |

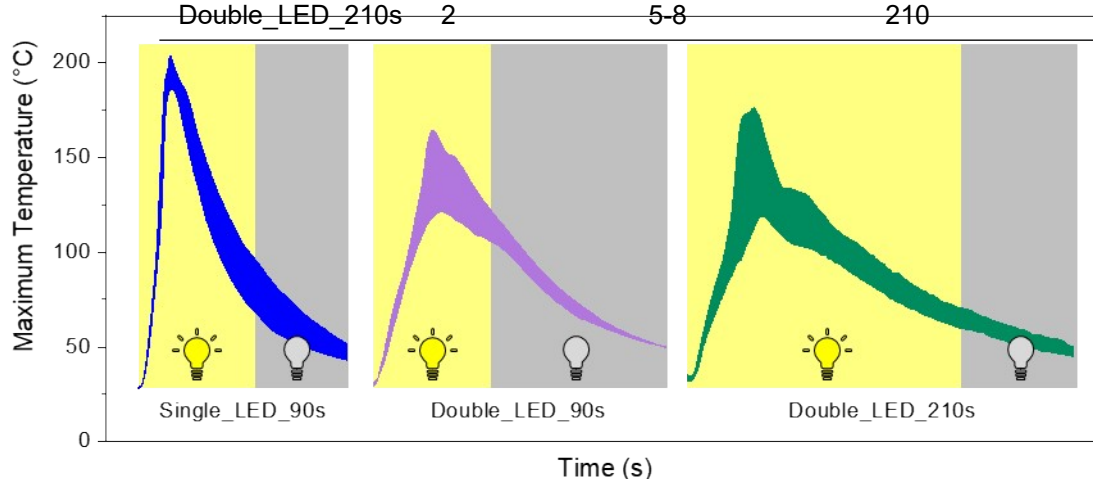

Figure S 9. Maximum temperatures developed on the irradiated side of single- or double-layer composites polymerized in different curing conditions whit LED lamp in one irradiation step (sample description and curing parameters in Table S 8).



Table S 9. Optimized curing parameters for 2.1 T67/2 ITX single- and double- layer composites with the ad-hoc designed LED lamp.

|                         | <b>Single-layer</b>    | <b>Double-layer</b>    |
|-------------------------|------------------------|------------------------|
| <b>Light intensity</b>  | 5-8 mW/cm <sup>2</sup> | 5-8 mW/cm <sup>2</sup> |
| <b>Irradiation time</b> | 90 s                   | 210 s                  |

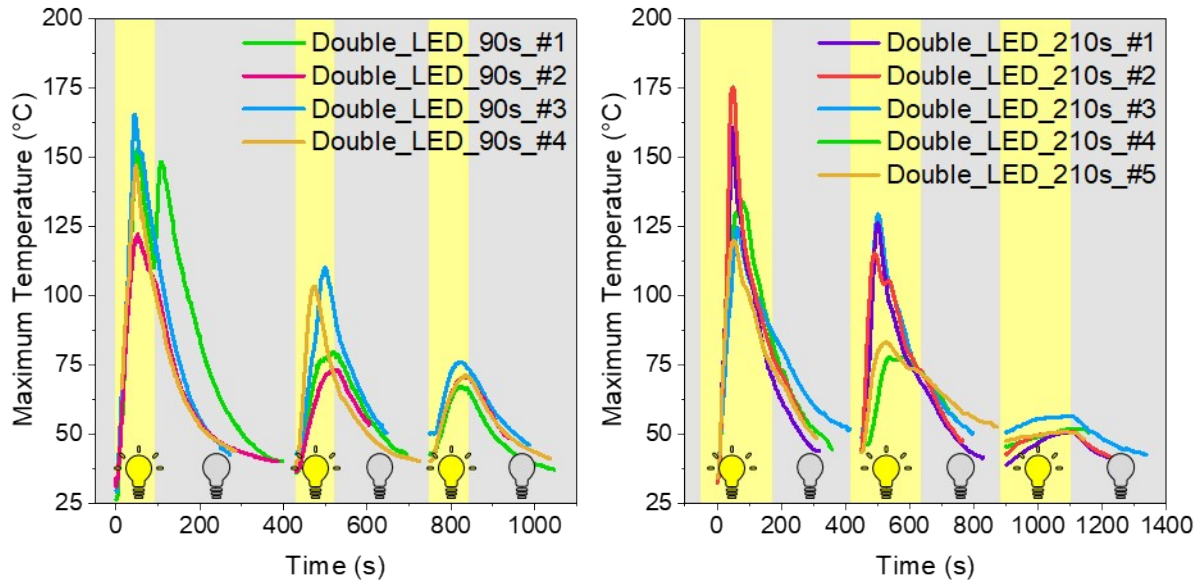

Figure S 10. External maximum temperatures developed on the irradiated side of 2.1 T67/2 ITX cylindrical double-layer composites samples described in Table S 8 and irradiated in 3 steps.

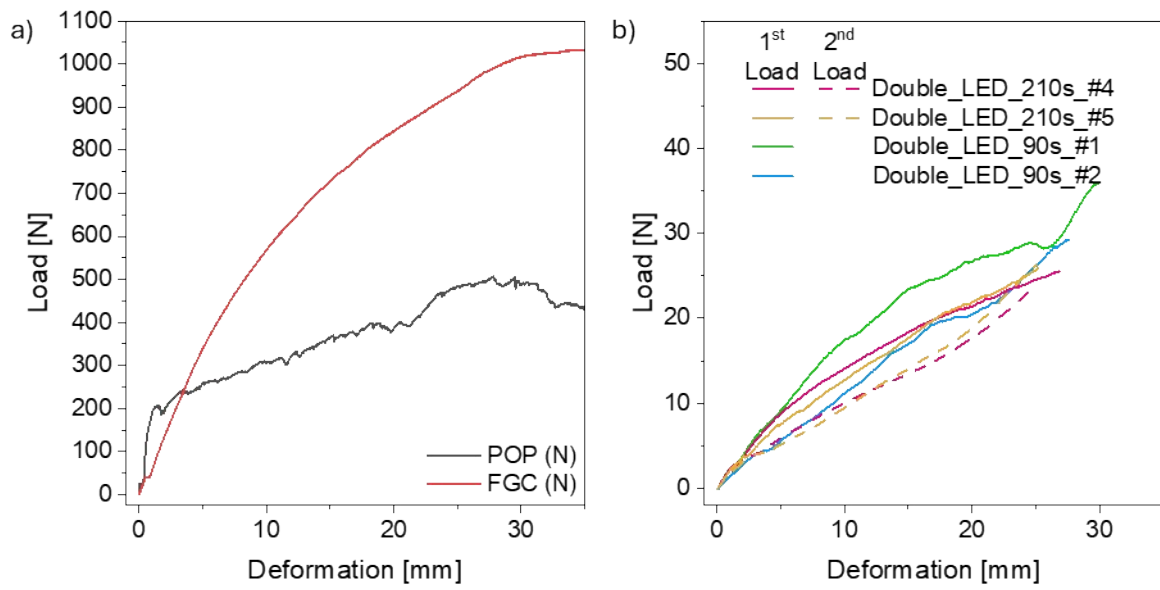

Figure S 11. Load vs. Deformation of: a) POP and FGC samples prepared by a registered technician; b) cylindrical double-layer composites cured with LED Lamp (parameters in Table S 8) in 3 steps.

Table S 10. Initial stiffness and Yield force evaluated after two consecutive 3 point bending test on: cylindrical double-layer composites after 2 months since irradiation, POP and FGC reference samples prepared by a registered technician

|                    | First Bending test                                  |                 | Second Bending test                                 |                 | Maintaining of the mechanical properties (second vs. first test) |              |
|--------------------|-----------------------------------------------------|-----------------|-----------------------------------------------------|-----------------|------------------------------------------------------------------|--------------|
|                    | Initial Stiffness <sup>a</sup> (N/mm <sup>2</sup> ) | Yield Force (N) | Initial Stiffness <sup>b</sup> (N/mm <sup>2</sup> ) | Yield Force (N) | Initial stiffness                                                | Yield stress |
| Double_LED_210S_#1 | 4.95                                                | 1.73            | 3.78                                                | 3               | 76%                                                              | 173%         |
| Double_LED_210S_#2 | 6.65                                                | 2.99            | 3.47                                                | 2.95            | 52%                                                              | 99%          |
| Double_LED_210S_#3 | 4.04                                                | 2.85            | 3.52                                                | 3.8             | 87%                                                              | 133%         |
| Double_LED_210S_#4 | 2.38                                                | 3.05            | 1.94                                                | 2.6             | 82%                                                              | 85%          |
| Double_LED_210S_#5 | 2.13                                                | 3.52            | 1.84                                                | 2.8             | 86%                                                              | 80%          |
| Double_LED_90S_#1  | 2.46                                                | 2.65            | -                                                   | -               | -                                                                | -            |
| Double_LED_90S_#2  | 1.34                                                | 4.23            | -                                                   | -               | -                                                                | -            |
| POP                | 333                                                 | 23              | -                                                   | -               | -                                                                | -            |
| FGC                | 72                                                  | 40              | -                                                   | -               | -                                                                | -            |

<sup>a</sup> R<sup>2</sup>>0.99

<sup>b</sup> R<sup>2</sup>>0.96

Table S 11. Mass variation after harsh conditions exposure of double-layer composites.

|                                | <b>Hot humid environment</b> | <b>Cold humid environment</b> | <b>Soaked in water</b> | <b>Direct sun exposure</b> |
|--------------------------------|------------------------------|-------------------------------|------------------------|----------------------------|
| <b>After exposure</b>          | 1.03%                        | 0.27%                         | 21.72%                 | 0.07%                      |
| <b>1 hour after exposure</b>   | 0.57%                        | 0.03%                         | 7.85%                  | -                          |
| <b>17 hours after exposure</b> | 0.48%                        | 0.12%                         | -0.90%                 | -                          |
| <b>24 hours after exposure</b> | 0.44%                        | 0.12%                         | -0.97%                 | 0.55%                      |
